# Supplementary material
Source: PubMed Central journal article supplement (PMC6219468)
Supplement: NIHMS993192-supplement-1.pdf [file NIHMS993192-supplement-1.pdf]

## Models of Network Spread and Network Degeneration in Brain Disorders

### *Supplemental Information*

#### **Diffusion MRI to Connectivity**

The key steps and methods in network extraction are now well established (1–3). The original 6-direction diffusion tensor imaging (DTI) (4) has given way to modern high-angular-resolution diffusion imaging (HARDI) sequences that overcome several challenges of conventional DTI, *viz* poor orientation resolution, inability to detect crossing or kissing fibers, and inability to measure non-Gaussian diffusion processes (5, 6). Several algorithms for reconstruction of fiber orientation from HARDI acquisitions are available, including Q-ball imaging (5, 7), diffusion spectrum imaging (8), spherical deconvolution (9, 10), 3D curve inference (11) and diffusion kurtosis imaging (12). **Tractography** refers to the computational algorithms needed to connect voxels in brain dMRI data along the directions of putative fibers. *Deterministic* tractography (13, 14) and *probabilistic* tractography (15) are both popular methods, and new algorithmic advances have yielded *global* tractography algorithms (16–18). An excellent review article is (19). **Anatomic brain networks** were first extracted from tractography by (2, 8, 20) and the requisite processing pipelines are now well established, following (2, 21). As illustrated in Figure S1, this involves coregistering subject MRI and dMRI onto a standard atlas, e.g. Desikan-Killiany atlas (22); segmentation into gray, white and CSF; and parcellation into gray matter structures. Parcels are used to establish the seed and target regions for tractography, and the connectivity between the two is given by summing the probabilities of the streamlines.

#### **Graph Theory Analysis**

Characteristic graph metrics to examine differences in network topology are now widely available and published. These network metrics include global (network-wide) metrics like connection density, global

efficiency, clustering coefficient, small-worldness, average shortest path length, modularity, etc. Several metrics have local counterparts, i.e. can be defined at the node or edge level, including: Local connection strength, local efficiency and local modularity. A widely cited open resource available in MATLAB for computing these metrics is the Brain Connectivity Toolbox (BCT) as described in (23). Specific network statistics have been examined extensively in prior reviews, see (1, 3, 24, 25).

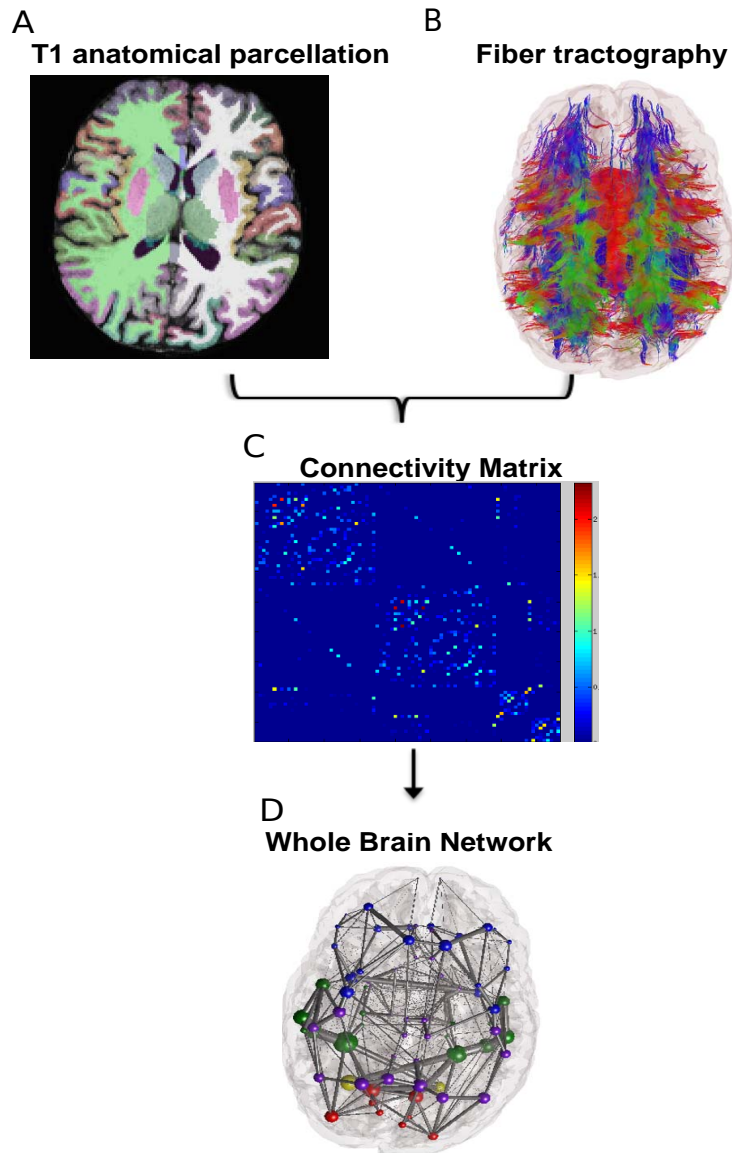

**Figure S1:** General pipeline of connectome extraction, from T1-MRI and dMRI, to coregistration, atlas-based parcellation to tractography, and finally culminating in a connectivity matrix representing the whole brain network.

## Supplemental References

1. Bullmore E, Sporns O (2009): Complex brain networks: graph theoretical analysis of structural and functional systems. *Nat Rev Neurosci*. 10: 186–198.
2. Hagmann P, Kurant M, Gigandet X, Thiran P, Wedeen VJ, Meuli R, Thiran J-P (2007): Mapping Human Whole-Brain Structural Networks with Diffusion MRI. *PLoS One*. 2: e597.
3. Iturria-Medina Y (2013): Anatomical brain networks on the prediction of abnormal brain states. *Brain Connect*. 3: 1–21.
4. Basser PJ, Mattiello J, LeBihan D (1994): Estimation of the effective self-diffusion tensor from the NMR spin echo. *J Magn Reson B*. 103: 247–54.
5. Tuch DS (2004): Q-ball imaging. *Magn Reson Med*. 52: 1358–1372.
6. Nath V, Schilling KG, Blaber JA, Ding Z, Anderson AW, Landman BA (2017): Comparison of multi-fiber reproducibility of PAS-MRI and Q-ball with empirical multiple b-value HARDI. In: Styner MA, Angelini ED, editors. (Vol. 10133), International Society for Optics and Photonics, p 101330L.
7. Canales-Rodríguez EJ, Melie-García L, Iturria-Medina Y (2009): Mathematical description of q-space in spherical coordinates: exact q-ball imaging. *Magn Reson Med*. 61: 1350–67.
8. Wedeen VJ, Wang RP, Schmahmann JD, Benner T, Tseng WYI, Dai G, *et al.* (2008): Diffusion spectrum magnetic resonance imaging (DSI) tractography of crossing fibers. *Neuroimage*. 41: 1267–1277.
9. Tournier J-D, Calamante F, Gadian DG, Connelly A (2004): Direct estimation of the fiber orientation density function from diffusion-weighted MRI data using spherical deconvolution. *Neuroimage*. 23: 1176–85.
10. Smith RE, Tournier J-D, Calamante F, Connelly A (2013): SIFT: Spherical-deconvolution informed filtering of tractograms. *Neuroimage*. 67: 298–312.
11. Savadjiev P, Campbell JSW, Pike GB, Siddiqi K (2006): 3D curve inference for diffusion MRI regularization and fibre tractography. *Med Image Anal*. 10: 799–813.
12. Jensen JH, Helpert JA, Ramani A, Lu H, Kaczynski K (2005): Diffusional kurtosis imaging: The quantification of non-gaussian water diffusion by means of magnetic resonance imaging. *Magn Reson Med*. 53: 1432–1440.
13. Basser PJ, Pajevic S, Pierpaoli C, Duda J, Aldroubi A (2000): In vivo fiber tractography using DT-MRI data. *Magn Reson Med*. 44: 625–32.
14. Mori S, Crain BJ, Chacko VP, van Zijl PC (1999): Three-dimensional tracking of axonal projections in the brain by magnetic resonance imaging. *Ann Neurol*. 45: 265–9.
15. Behrens TEJ, Berg HJ, Jbabdi S, Rushworth MFS, Woolrich MW (2007): Probabilistic diffusion tractography with multiple fibre orientations: What can we gain? *Neuroimage*. 34: 144–155.
16. Jbabdi S, Woolrich MW, Andersson JLR, Behrens TEJ (2007): A Bayesian framework for global tractography. *Neuroimage*. 37: 116–129.
17. Ivkovic M, Raj A (2011): Global estimation of anatomical connection strength in diffusion MRI tractography by message-passing. *2011 IEEE Int Symp Inf Theory Proc*. IEEE, pp 2721–2725.
18. Iturria-Medina Y, Canales-Rodríguez EJ, Melie-García L, Valdés-Hernández PA, Martínez-Montes E, Alemán-Gómez Y, Sánchez-Bornot JM (2007): Characterizing brain anatomical connections using

- diffusion weighted MRI and graph theory. *Neuroimage*. 36: 645–60.
19. Jbabdi S, Johansen-Berg H (2011): Tractography: where do we go from here? *Brain Connect*. 1: 169–83.
  20. Hagmann P, Cammoun L, Gigandet X, Meuli R, Honey CJ, Wedeen VJ, Sporns O (2008): Mapping the structural core of human cerebral cortex. *PLoS Biol*. 6: e159.
  21. Iturria-Medina Y, Canales-Rodriguez EJ, Aleman-Gomez Y, Sotero RC, Melie-Garcia L (2008): Studying the human brain anatomical network via diffusion-weighted MRI and Graph Theory. *Neuroimage*. 40: 1064–76.
  22. Fischl B, Salat DH, Busa E, Albert M, Dieterich M, Haselgrove C, *et al.* (2002): Whole brain segmentation: automated labeling of neuroanatomical structures in the human brain. *Neuron*. 33: 341–55.
  23. Rubinov M, Sporns O (2010): Complex network measures of brain connectivity: Uses and interpretations. *Neuroimage*. 52: 1059–1069.
  24. Zalesky A, Fornito A, Harding IH, Cocchi L, Yücel M, Pantelis C, *et al.* (2010): Revisiting the Foundations of Network Analysis. *Neuroimage*. 20: 353–364.
  25. Bassett DS, Bullmore E (2006): Small-World Brain Networks. *Neurosci*. 12: 512–523.
